# Supplementary material for: Modeling Bi-modality Improves Characterization of Cell Cycle on Gene Expression in Single Cells
Source: PubMed Central journal article supplement (PMC4102402; doi:10.1371/journal.pcbi.1003696), 2014-07-17
Supplement: pcbi.1003696.s001.pdf [file pcbi.1003696.s001.pdf]

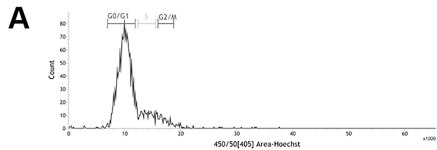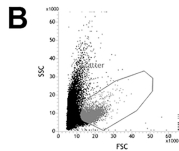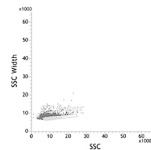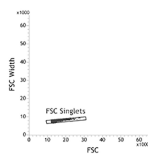

**C**

Statistics: H9 Final PreSort

| Populations | Events | % Parent | Median FSC | Median SSC | Median 450/50[405] |
|-------------|--------|----------|------------|------------|--------------------|
| S           | 309    | 14.64%   | 13,730     |            |                    |
| G0/G1       | 1,541  | 73.03%   | 9,919      |            |                    |
| G2/M        | 157    | 7.44%    | 16,721     |            |                    |

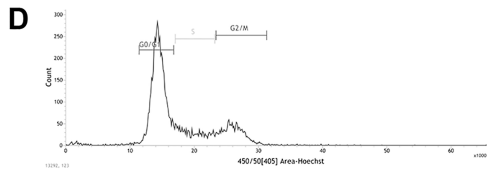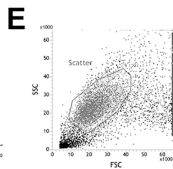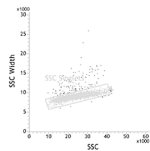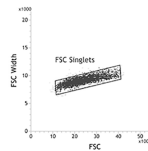

**F**

Statistics: 01-07-2013 MDA PreSort Singlets

| Populations | Events | % Parent | Median FSC | Median SSC | Median 450/50[405] |
|-------------|--------|----------|------------|------------|--------------------|
| S           | 858    | 19.77%   | 25,170     | 26,372     | 18,988             |
| G0/G1       | 2,565  | 59.10%   | 20,090     | 20,483     | 14,668             |
| G2/M        | 775    | 17.86%   | 28,909     | 28,993     | 26,371             |

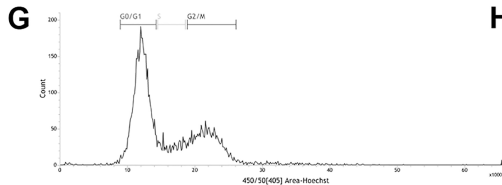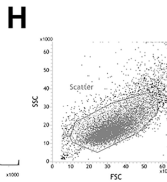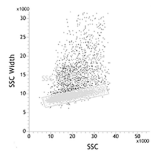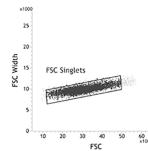

**I**

Statistics: PC-3 12-10-12\_Final pre-sort final

| Populations | Events | % Parent | Median FSC | Median SSC | Median 450/50[405] |
|-------------|--------|----------|------------|------------|--------------------|
| S           | 903    | 13.20%   | 31,387     | 17,117     | 16,615             |
| G0/G1       | 3,700  | 54.09%   | 27,237     | 14,283     | 12,062             |
| G2/M        | 1,928  | 28.18%   | 35,534     | 19,298     | 21,799             |
