# Supplementary material for: Modeling Bi-modality Improves Characterization of Cell Cycle on Gene Expression in Single Cells
Source: PubMed Central journal article supplement (PMC4102402; doi:10.1371/journal.pcbi.1003696), 2014-07-17

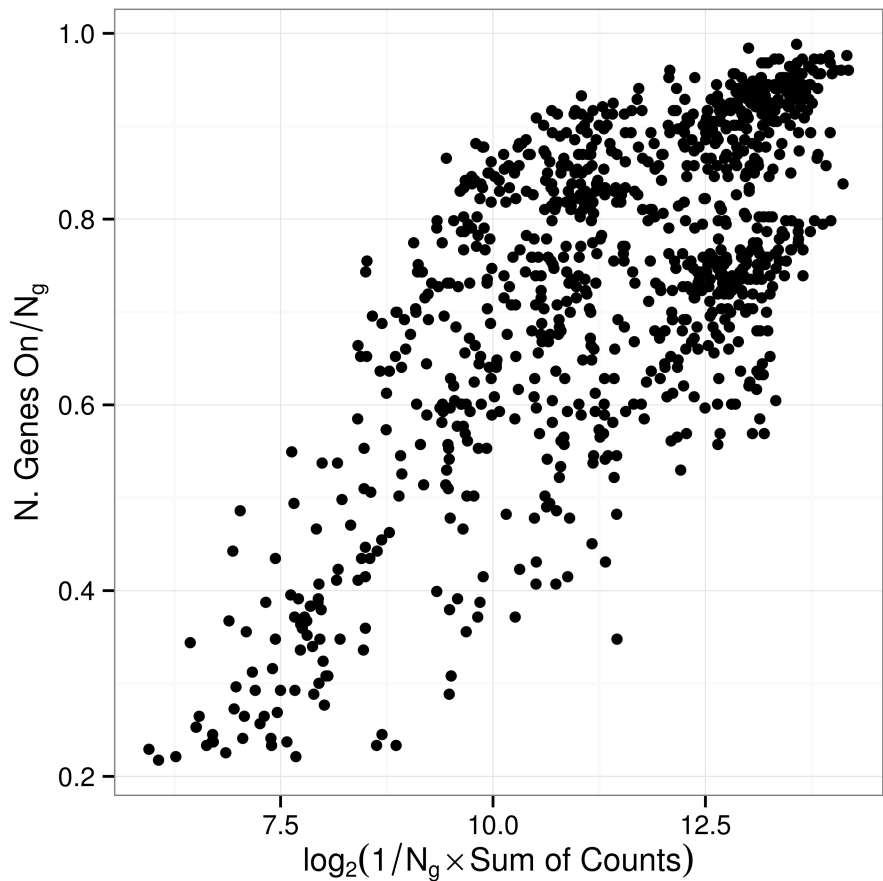

Supplement: pcbi.1003696.s005.pdf [file pcbi.1003696.s005.pdf]
